# Supplementary material
Source: Research Square preprint supplement (doi:10.21203/rs.3.rs-10258172/v1)
Supplement: Supplementary file 1 [file 8c2cf872146eb58aaeb93d0d.xlsx]

## Sheet: Sheet1
Method	Runs	Safe HV	Safe HV AUC	Viol. rate	Cost	Time (s)
CRC-LS-MOCBO	120	4.326	90	0.007	73.77	78.24
MAP-CBO	120	4.308	89.6	0.0117	74.62	14.08
Noncausal-qNEHVI	120	3.841	84.13	0.0213	82.71	13.58
Safe-Sobol	120	4.002	86.46	0.021	93.75	51.62
True-SCM oracle	120	4.478	92.28	0.0033	61.62	89.84
